# Supplementary material
Source: PubMed Central journal article supplement (PMC6004334)
Supplement: NIHMS971978-supplement-Supplemental_Materials.pdf [file NIHMS971978-supplement-Supplemental_Materials.pdf]

Table 5. Odds ratios for association between race and SES with exposure to tobacco marketing

|                                              | Never users           |         |                             |         |                         |         |                       |         |                             |         |                         |         |
|----------------------------------------------|-----------------------|---------|-----------------------------|---------|-------------------------|---------|-----------------------|---------|-----------------------------|---------|-------------------------|---------|
|                                              | Recall - cigarette ad |         | Recall - non-large cigar ad |         | Recall - e-cigarette ad |         | Liking - cigarette ad |         | Liking - non,large cigar ad |         | Liking - e-cigarette ad |         |
|                                              | OR [95% CI]           | p       | OR [95% CI]                 | p       | OR [95% CI]             | p       | OR [95% CI]           | p       | OR [95% CI]                 | p       | OR [95% CI]             | p       |
| <b>Race</b>                                  |                       |         |                             |         |                         |         |                       |         |                             |         |                         |         |
| African American [ref: NHW]                  | 1.39[1.21,1.59]       | < .0001 | 2.49[2,3.09]                | < .0001 | 1.09[0.93,1.28]         | 0.272   | 1.49[1.01-2.2]        | 0.045   | 1.71[1.06,2.77]             | 0.029   | 1.7[1.29,2.26]          | < .0001 |
| Hispanic (ref: NHW)                          | 0.95[0.82,1.11]       | 0.513   | 1.21[0.97,1.52]             | 0.095   | 1.09[0.98,1.23]         | 0.123   | 1.13[0.83-1.54]       | 0.419   | 1.32[0.9,1.93]              | 0.150   | 1.28[0.94,1.74]         | 0.111   |
| <b>SES</b>                                   |                       |         |                             |         |                         |         |                       |         |                             |         |                         |         |
| LT High School (Ref: College deg. or higher) | 1.27[1.08,1.49]       | 0.004   | 1.7[1.36,2.13]              | < .0001 | 0.98[0.84,1.14]         | 0.751   | 0.63[0.42-0.94]       | 0.023   | 0.69[0.4,1.17]              | 0.169   | 0.71[0.51,1]            | 0.049   |
| HS grad (Ref: College deg. or higher)        | 1.3[1.1,1.54]         | 0.002   | 1.41[1.1,1.81]              | 0.007   | 1.03[0.89,1.2]          | 0.701   | 0.65[0.43-0.97]       | 0.037   | 0.82[0.5,1.33]              | 0.411   | 0.79[0.55,1.14]         | 0.207   |
| Some college (Ref: College deg. or higher)   | 1.26[1.1,1.45]        | 0.001   | 1.53[1.22,1.94]             | < .0001 | 1.14[1.02,1.26]         | 0.017   | 0.64[0.46-0.89]       | 0.009   | 0.86[0.56,1.33]             | 0.503   | 0.89[0.65,1.22]         | 0.454   |
| <b>Gender</b>                                |                       |         |                             |         |                         |         |                       |         |                             |         |                         |         |
| Female (ref: Male)                           | 1.55[1.41,1.7]        | < .0001 | 1.26[1.07,1.47]             | 0.005   | 1.07[0.96,1.18]         | 0.232   | 1.18[0.86-1.62]       | 0.292   | 0.99[0.68,1.44]             | 0.966   | 1.15[0.89,1.49]         | 0.278   |
| <b>Age</b>                                   |                       |         |                             |         |                         |         |                       |         |                             |         |                         |         |
| 15,17 y.o. (ref: 12,14 y.o.)                 | 0.98[0.88,1.09]       | 0.749   | 1.17[0.99,1.39]             | 0.065   | 1.15[1.04,1.27]         | 0.007   | 2.12[1.55-2.9]        | < .0001 | 1.61[1.14,2.26]             | 0.007   | 1.45[1.13,1.86]         | 0.004   |
| Constant                                     | 0.17[0.15,0.2]        | < .0001 | 0.04[0.03,0.05]             | < .0001 | 0.36[0.32,0.4]          | < .0001 | 0.02[0.01-0.03]       | < .0001 | 0.01[0.01,0.02]             | < .0001 | 0.03[0.02,0.04]         | < .0001 |
|                                              | Ever users            |         |                             |         |                         |         |                       |         |                             |         |                         |         |
|                                              | Recall - cigarette ad |         | Recall - non-large cigar ad |         | Recall - e-cigarette ad |         | Liking - cigarette ad |         | Liking - non,large cigar ad |         | Liking - e-cigarette ad |         |
|                                              | OR [95% CI]           | p       | OR [95% CI]                 | p       | OR [95% CI]             | p       | OR [95% CI]           | p       | OR [95% CI]                 | p       | OR [95% CI]             | p       |
| <b>Race</b>                                  |                       |         |                             |         |                         |         |                       |         |                             |         |                         |         |
| African American (ref: NHW)                  | 1.2[0.97,1.48]        | 0.090   | 1.48[1.11,1.98]             | 0.008   | 0.88[0.67,1.17]         | 0.382   | 1.4[0.84-2.32]        | 0.19    | 1.71[1.08,2.71]             | 0.022   | 0.87[0.55,1.36]         | 0.529   |
| Hispanic (ref: NHW)                          | 0.87[0.68,1.1]        | 0.230   | 1.21[0.92,1.58]             | 0.174   | 1.13[0.92,1.39]         | 0.256   | 0.66[0.43-1.02]       | 0.058   | 1.17[0.83,1.65]             | 0.357   | 1.23[0.94,1.61]         | 0.122   |
| <b>SES</b>                                   |                       |         |                             |         |                         |         |                       |         |                             |         |                         |         |
| LT High School (Ref: College deg. or higher) | 1.24[0.92,1.67]       | 0.160   | 2.02[1.39,2.92]             | < .0001 | 0.9[0.68,1.21]          | 0.495   | 1.08[0.66-1.76]       | 0.77    | 1.68[1.01,2.8]              | 0.044   | 0.98[0.65,1.47]         | 0.904   |
| HS grad (Ref: College deg. or higher)        | 1.37[1.01,1.86]       | 0.040   | 2.15[1.54,3.02]             | < .0001 | 0.95[0.73,1.23]         | 0.689   | 0.9[0.59-1.37]        | 0.624   | 1.16[0.74,1.81]             | 0.525   | 0.7[0.45,1.09]          | 0.111   |
| Some college (Ref: College deg. or higher)   | 1.38[1.05,1.81]       | 0.020   | 1.76[1.26,2.46]             | 0.001   | 1[0.79,1.26]            | 0.999   | 0.99[0.63-1.54]       | 0.951   | 1.11[0.68,1.81]             | 0.673   | 1.14[0.74,1.74]         | 0.551   |
| <b>Gender</b>                                |                       |         |                             |         |                         |         |                       |         |                             |         |                         |         |
| Female (ref: Male)                           | 1.67[1.42,1.96]       | < .0001 | 1.12[0.89,1.4]              | 0.331   | 1.04[0.89,1.22]         | 0.632   | 1.01[0.72-1.41]       | 0.975   | 0.75[0.54,1.04]             | 0.085   | 0.86[0.65,1.14]         | 0.290   |
| <b>Age</b>                                   |                       |         |                             |         |                         |         |                       |         |                             |         |                         |         |
| 15,17 y.o. (ref: 12,14 y.o.)                 | 0.72[0.59,0.88]       | < .0001 | 1.06[0.83,1.34]             | 0.650   | 0.92[0.74,1.14]         | 0.423   | 1.31[0.84-2.02]       | 0.228   | 1.17[0.84,1.64]             | 0.349   | 1[0.69,1.45]            | 0.987   |
| Constant                                     | 0.31[0.23,0.42]       | < .0001 | 0.1[0.07,0.15]              | < .0001 | 0.64[0.47,0.85]         | 0.003   | 0.06[0.03-0.1]        | < .0001 | 0.05[0.03,0.08]             | < .0001 | 0.12[0.08,0.19]         | < .0001 |

Table 5 (cont.). Odds ratios for association between race and SES with exposure to tobacco marketing

| Never users                                     |                          |         |                  |         |                      |         |
|-------------------------------------------------|--------------------------|---------|------------------|---------|----------------------|---------|
|                                                 | Seen tobacco sweepstakes |         | Obtained coupon  |         | Obtained free sample |         |
|                                                 | OR [95% CI]              | p       | OR [95% CI]      | p       | OR [95% CI]          | p       |
| <b>Race</b>                                     |                          |         |                  |         |                      |         |
| African American [ref: NHW]                     | 0.85[0.73,0.99]          | 0.035   | 1.00[0.77,1.30]  | 0.999   | 3.09[0.94,10.17]     | 0.064   |
| Hispanic (ref: NHW)                             | 0.7[0.61,0.81]           | < .0001 | 0.71[0.54,0.93]  | 0.014   | 1.67[0.53,5.27]      | 0.380   |
| <b>SES</b>                                      |                          |         |                  |         |                      |         |
| LT High School<br>(Ref: College deg. or higher) | 1.55[1.33,1.81]          |         |                  |         |                      |         |
| HS grad<br>[Ref: College deg. or higher]        | 1.53[1.34,1.76]          | < .0001 | 1.75[1.31,2.35]  | < .0001 | 2.25[0.59,8.63]      | 0.233   |
| Some college<br>(Ref: College deg. or higher)   | 1.36(1.2,1.55]           | < .0001 | 1.67[1.28,2.17]  | < .0001 | 1.95[0.48,7.93]      | 0.347   |
| <b>Gender</b>                                   |                          | < .0001 | 1.63[1.28,2.09]  | < .0001 | 0.64[0.16,2.55]      | 0.523   |
| Female [ref: Male)                              | 0.99[0.90,1.10]          | 0.900   | 1.4[1.15,1.7]]   | 0.001   | 2.61[1.08,6.31]      | 0.033   |
| <b>Age</b>                                      |                          |         |                  |         |                      |         |
| 15-17 y.o. (ref: 12,14 y.o.)                    | 0.77[0.69,0.85]          | < .0001 | 0.89[0.73,1.09]  | 0.262   | 0.51[0.2,1.3]        | 0.157   |
| Constant                                        | 0.31[0.27,0.35]          | < .0001 | 0.04[0.03,0.05]  | < .0001 | 0[0,0]               | < .0001 |
| Ever users                                      |                          |         |                  |         |                      |         |
|                                                 | Seen tobacco sweepstakes |         | Obtained coupon  |         | Obtained free sample |         |
|                                                 | OR [95% CI]              | P       | OR [95% CI]      | P       | OR [95% CI]          | p       |
| <b>Race</b>                                     |                          |         |                  |         |                      |         |
| African American (ref: NHW)                     | 0.79[0.61,1.02]          | 0.068   | 0.42[0.28,0.62]  | < .0001 | 0.54[0.19,1.51]      | 0.236   |
| Hispanic (ref: NHW)                             | 0.63[0.5,0.81]           | < .0001 | 0.54[0.40,0.73]  | < .0001 | 1.10[0.55,2.17]      | 0.789   |
| <b>SES</b>                                      |                          |         |                  |         |                      |         |
| LT High School<br>(Ref: College deg. or higher) | 1.99[1.49,2.67]          | < .0001 | 2.11[1.38,3.23]  | 0.001   | 1.61[0.69,3.74]      | 0.264   |
| HS grad<br>(Ref: College deg. or higher)        | 1.69[1.22,2.33]          | 0.002   | 2.15[1.47,3.14]  | < .0001 | 1.88[0.86,4.09]      | 0.112   |
| Some college<br>(Ref: College deg. or higher)   | 1.77[1.36,2.31]          | < .0001 | 1.76[1.25,2.47]  | 0.001   | 1.04[0.49,2.22]      | 0.919   |
| <b>Gender</b>                                   |                          |         |                  |         |                      |         |
| Female (ref: Male)                              | 1.00[0.84,1.20]          | 0.966   | 1.21[0.96,1.53]] | 0.110   | 0.41[0.22,0.77]      | 0.005   |
| <b>Age</b>                                      |                          |         |                  |         |                      |         |
| 15-17 y.o. (ref: 12,14 y.o.)                    | 0.56[0.45,0.68]          | < .0001 | 1.11[0.84,1.47]  | 0.455   | 0.76[0.49,1.16]      | 0.194   |
| Constant                                        | 0.46[0.34,0.61]          | < .0001 | 0.11[0.07,0.16]  | < .0001 | 0.03[0.01,0.07]      | < .0001 |

Table 6. Odds ratios for association between race and SES on self-reported role of tobacco marketing (among tobacco users)

|                                                 | Used product because advertising appeals to me |       |                  |       | Used product because people in the media or other public figures use them |       |                 |       |                  |         |
|-------------------------------------------------|------------------------------------------------|-------|------------------|-------|---------------------------------------------------------------------------|-------|-----------------|-------|------------------|---------|
|                                                 | E-cigarettes                                   |       | Non-large cigars |       | Cigarettes                                                                |       | E,cigarettes    |       | Non,large cigars |         |
|                                                 | OR [95% CI]                                    | p     | OR [95% CI]      | p     | OR [95% CI]                                                               | p     | OR [95% CI]     | p     | OR [95% CI]      | p       |
| <b>Race</b>                                     |                                                |       |                  |       |                                                                           |       |                 |       |                  |         |
| African American<br>(ref: NHW)                  | 5.42[2.10,13.99]                               | 0.001 | 1.22[0.43,3.41]  | 0.705 | 3.45[1.09,10.9]                                                           | 0.035 | 1.68[0.76,3.7]  | 0.198 | 1.88[0.95,3.71]  | 0.069   |
| Hispanic<br>(ref: NHW)                          | 0.98[0.49,1.94]                                | 0.951 | 1.53[0.64,3.67]  | 0.339 | 1.26[0.44,3.59]                                                           | 0.668 | 1.13[0.62,2.05] | 0.69  | 1.55[0.81,2.98]  | 0.183   |
| <b>SES</b>                                      |                                                |       |                  |       |                                                                           |       |                 |       |                  |         |
| LT High School<br>(Ref: College deg. or higher) | 3.79[1.42,10.14]                               | 0.008 | 2.85[0.63,12.84] | 0.169 | 2.29[0.33,15.93]                                                          | 0.399 | 3.06[1.46,6.42] | 0.003 | 3.35[1.28,8.79]  | 0.014   |
| HS grad<br>(Ref: College deg. or higher)        | 1.47[0.57,3.79]                                | 0.417 | 2.13[0.51,8.88]  | 0.296 | 2.18[0.30,15.64]                                                          | 0.435 | 1.97[1.03,3.74] | 0.039 | 1.56[0.61,4.0]   | 0.348   |
| Some college<br>(Ref: College deg. or higher)   | 2.24[0.96,5.19]                                | 0.06  | 3.65[0.94,14.15] | 0.061 | 2.17[0.34,13.86]                                                          | 0.409 | 1.44[0.75,2.74] | 0.268 | 1.48[0.58,3.8]   | 0.409   |
| <b>Gender</b>                                   |                                                |       |                  |       |                                                                           |       |                 |       |                  |         |
| Female<br>(ref: Male)                           | 0.72[0.40,1.28]                                | 0.256 | 0.56[0.28,1.09]  | 0.086 | 0.34[0.13,0.87]                                                           | 0.025 | 1.11[0.67,1.82] | 0.682 | 1.37[0.75,2.51]  | 0.308   |
| <b>Age</b>                                      |                                                |       |                  |       |                                                                           |       |                 |       |                  |         |
| 15,17 y.o.<br>(ref: 12-14 y.o.)                 | 0.51[0.25,1.08]                                | 0.077 | 0.74[0.24,2.21]  | 0.582 | 2.73[0.27,27.97]                                                          | 0.393 | 0.78[0.43,1.43] | 0.415 | 0.98[0.40,2.42]  | 0.971   |
| Constant                                        | 0.19[0.07,0.51]                                | 0.001 | 0.07[0.02,0.37]  | 0.002 | 0.04[0,0.64]                                                              | 0.023 | 0.39[0.2,0.77]  | 0.007 | 0.15[0.05,0.42]  | < .0001 |
